# Supplementary material
Source: PubMed Central journal article supplement (PMC10913931)
Supplement: JCOPDF-11-026-s001.pdf [file JCOPDF-11-026-s001.pdf]

## Online Supplement

### Lung Structure and Risk of Sleep Apnea in SPIROMICS

Abigail L. Koch, MD<sup>1</sup> Tracie L. Shing, DrPH<sup>2</sup> Andrew Namen, MD<sup>3</sup> David Couper, PhD<sup>2</sup> Benjamin Smith, MD, MSc<sup>4</sup> R. Graham Barr, MD, PhD<sup>4</sup> Surya Bhatt, MD, MSPH<sup>5</sup> Nirupama Putcha, MD, MHS<sup>6</sup> Aaron Baugh, MD<sup>7</sup> Amit K. Saha, PhD, MS<sup>3</sup> Michelle Zeidler, MD<sup>8</sup> Alejandro Comellas, MD<sup>9</sup> Christopher B. Cooper, MD<sup>8</sup> Igor Barjaktarevic, MD, PhD<sup>8</sup> Russell P. Bowler, MD, PhD<sup>10</sup> MeiLan K. Han, MD, MS<sup>11</sup> Victor Kim, MD<sup>12</sup> Robert Paine, III, MD<sup>13</sup> Richard E. Kanner, MD<sup>13</sup> Jerry A. Krishnan, MD, PhD<sup>14</sup> Fernando J. Martinez, MD, MS<sup>15</sup> Prescott G. Woodruff, MD, MPH<sup>7</sup> Nadia N. Hansel, MD<sup>6</sup> Eric A. Hoffman, PhD<sup>9</sup> Stephen P. Peters, MD, PhD<sup>3</sup> Victor E. Ortega, MD, PhD<sup>16</sup> for the SubPopulations and Intermediate Outcome Measures in COPD Study (SPIROMICS) Investigators

1. Leonard M. Miller School of Medicine, University of Miami, Miami, Florida, United States
2. Collaborative Studies Coordinating Center, Department of Biostatistics, Gillings' School of Global Public Health, University of North Carolina, Chapel Hill, North Carolina, United States
3. Section on Pulmonary, Critical Care, Allergy and Immunological Diseases, Wake Forest School of Medicine, Wake Forest, North Carolina, United States
4. Department of Medicine, Columbia University Medical Center, New York, New York, United States
5. Division of Pulmonary, Allergy, and Critical Care Medicine, University of Alabama at Birmingham, Birmingham, Alabama, United States
6. Division of Pulmonary and Critical Care Medicine, Johns Hopkins University, Baltimore, Maryland, United States
7. Division of Pulmonary and Critical Care Medicine, Department of Medicine, University of California, San Francisco, California, United States
8. Division of Pulmonary and Critical Care Medicine, Department of Medicine, David Geffen School of Medicine, University of California at Los Angeles, Los Angeles, California, United States
9. Departments of Radiology, Medicine, and Bioengineering, University of Iowa, Iowa City, Iowa, United States
10. Division of Pulmonary, Critical Care, and Sleep Medicine, National Jewish Health, Denver, Colorado, United States

11. Division of Pulmonary and Critical Care Medicine, School of Medicine, University of Michigan, Ann Arbor, Michigan, United States

12. Division of Pulmonary and Critical Care Medicine, Department of Medicine, Temple University School of Medicine, Philadelphia, Pennsylvania, United States

13. Division of Respiratory, Critical Care, and Occupational Pulmonary Medicine, Spencer Fox Eccles School of Medicine, University of Utah, Salt Lake City, Utah, United States

14. Division of Pulmonary, Critical Care, Sleep, and Allergy, University of Illinois at Chicago, Chicago, Illinois, United States

15. Division of Pulmonary and Critical Care Medicine, Weill Cornell Medical College, New York, New York, United States

16. Department of Internal Medicine, Division of Respiratory Diseases, Center for Individualized Medicine, Mayo Clinic, Scottsdale, Arizona, United States

**Table A1. Descriptive Statistics of High Risk OSA**

| Variable*                                                 | Overall Study Population (n=1767) |              | DOISNORE50 High Risk (n=642) |              | BSQ Apnea High Risk (n=1070) |               |
|-----------------------------------------------------------|-----------------------------------|--------------|------------------------------|--------------|------------------------------|---------------|
| Age (years)                                               | 1767                              | 62.9 (8.9)   | 642                          | 64.3 (7.9)   | 1070                         | 62.7 (8.8)    |
| Gender [Male] (%)                                         | 1767                              | 973 (55.1%)  | 642                          | 477 (74.3%)  | 1070                         | 592 (55.3%)   |
| <b>Race</b>                                               |                                   |              |                              |              |                              |               |
| White (%)                                                 | 1767                              | 1370 (77.5%) | 642                          | 516 (80.4%)  | 1070                         | 809 (75.6%)   |
| Black (%)                                                 | 1767                              | 314 (17.8%)  | 642                          | 92 (14.3%)   | 1070                         | 195 (18.2%)   |
| Other (%)                                                 | 1767                              | 83 (4.7%)    | 642                          | 34 (5.3%)    | 1070                         | 66 (6.2%)     |
| Ethnicity [Hispanic] (%)                                  | 1766                              | 81 (4.6%)    | 642                          | 35 (5.5%)    | 1070                         | 55 (5.1%)     |
| BMI                                                       | 1767                              | 28.1 (5.2)   | 642                          | 31.1 (4.9)   | 1070                         | 29.9 (5.2)    |
| Height (cm)                                               | 1767                              | 170.2 (9.6)  | 642                          | 172.9 (9.1)  | 1070                         | 170.2 (9.6)   |
| <b>Neck circumference (cm)</b>                            |                                   |              |                              |              |                              |               |
| Male                                                      | 973                               | 40.3 (3.8)   | 477                          | 42.0 (3.8)   | 592                          | 41.3 (3.8)    |
| Female                                                    | 794                               | 34.9 (4.0)   | 165                          | 37.7 (3.6)   | 478                          | 35.8 (4.3)    |
| Current smoking (%)                                       | 1767                              | 730 (41.3%)  | 642                          | 226 (35.2%)  | 1070                         | 451 (42.1%)   |
| Pack years smoking                                        | 1767                              | 48.5 (27.1)  | 642                          | 51.7 (28.6)  | 1070                         | 49.0 (24.3)   |
| History of stroke (%)                                     | 1766                              | 81 (4.6%)    | 641                          | 46 (7.2%)    | 1069                         | 59 (5.5%)     |
| History of hypertension (%)                               | 1767                              | 811 (45.9%)  | 642                          | 482 (75.1%)  | 1070                         | 710 (66.4%)   |
| History of palpitations, irregular heartbeat (%)          | 1766                              | 200 (11.3%)  | 641                          | 98 (15.3%)   | 1069                         | 129 (12.1%)   |
| BSQ Apnea Risk [High Risk] (%)                            | 1767                              | 1070 (60.6%) | 642                          | 557 (86.8%)  | 1070                         | 1070 (100.0%) |
| DOISNORE50 Score                                          | 1767                              | 5.0 (1.6)    | 642                          | 6.6 (0.8)    | 1070                         | 5.6 (1.3)     |
| DOISNORE50 Risk [High Risk] (%)                           | 1767                              | 642 (36.3%)  | 642                          | 642 (100.0%) | 1070                         | 557 (52.1%)   |
| Percent Predicted Pre-Bronchodilator FEV1                 | 1767                              | 68.1 (26.8)  | 642                          | 65.7 (25.1)  | 1070                         | 67.7 (25.7)   |
| Percent Predicted Post-Bronchodilator FEV1                | 1767                              | 74.8 (26.3)  | 642                          | 72.3 (24.6)  | 1070                         | 74.3 (25.1)   |
| Percent Predicted Pre-Bronchodilator FVC                  | 1767                              | 86.0 (19.6)  | 642                          | 83.3 (18.8)  | 1070                         | 84.6 (19.0)   |
| Percent Predicted Post-Bronchodilator FVC                 | 1767                              | 91.9 (18.1)  | 642                          | 89.2 (17.3)  | 1070                         | 90.5 (17.5)   |
| Pre-Bronchodilator FEV1/FVC                               | 1767                              | 0.6 (0.2)    | 642                          | 0.6 (0.2)    | 1070                         | 0.6 (0.2)     |
| Post-Bronchodilator FEV1/FVC                              | 1767                              | 0.6 (0.2)    | 642                          | 0.6 (0.2)    | 1070                         | 0.6 (0.2)     |
| <b>Gold Stage COPD Severity</b>                           |                                   |              |                              |              |                              |               |
| No airflow limitation                                     | 1767                              | 648 (36.7%)  | 642                          | 203 (31.6%)  | 1070                         | 402 (37.6%)   |
| GOLD 1: Mild                                              | 1767                              | 256 (14.5%)  | 642                          | 95 (14.8%)   | 1070                         | 139 (13.0%)   |
| GOLD 2: Moderate                                          | 1767                              | 504 (28.5%)  | 642                          | 215 (33.5%)  | 1070                         | 326 (30.5%)   |
| GOLD 3: Severe                                            | 1767                              | 261 (14.8%)  | 642                          | 98 (15.3%)   | 1070                         | 150 (14.0%)   |
| GOLD 4: Very severe                                       | 1767                              | 98 (5.5%)    | 642                          | 31 (4.8%)    | 1070                         | 53 (5.0%)     |
| CAT Score                                                 | 1687                              | 13.9 (8.2)   | 620                          | 16.1 (8.1)   | 1028                         | 15.5 (8.3)    |
| SGRQ Score                                                | 1624                              | 32.8 (20.4)  | 595                          | 38.3 (20.2)  | 979                          | 37.3 (20.7)   |
| Annualized Rate of HCU/Drug Exacerbations                 | 1716                              | 0.4 (0.7)    | 628                          | 0.4 (0.8)    | 1039                         | 0.4 (0.8)     |
| Annualized Rate of Severe Exacerbations                   | 1716                              | 0.1 (0.4)    | 628                          | 0.2 (0.5)    | 1039                         | 0.2 (0.5)     |
| <b>Low attenuation areas on full-lung CT</b>              |                                   |              |                              |              |                              |               |
| Percent below and including - 856 Hounsfield units at RV  | 1755                              | 23.7 (21.4)  | 639                          | 22.3 (19.8)  | 1062                         | 21.2 (19.9)   |
| Percent below and including - 950 Hounsfield units at TLC | 1756                              | 7.7 (10.2)   | 640                          | 6.6 (8.8)    | 1064                         | 6.4 (9.1)     |
| <b>Airway Dimensions</b>                                  |                                   |              |                              |              |                              |               |
| Trachea lumen area (mm <sup>2</sup> )                     | 1756                              | 275.1 (75.4) | 641                          | 284.8 (75.2) | 1064                         | 269.6 (74.5)  |

|                                                                        |      |                  |     |               |      |               |
|------------------------------------------------------------------------|------|------------------|-----|---------------|------|---------------|
| <b>Trachea wall area (mm<sup>2</sup>)</b>                              | 1756 | 181.7 (35.5)     | 641 | 192.9 (35.4)  | 1064 | 182.1 (36.0)  |
| <b>Trachea percent wall area</b>                                       | 1756 | 40.2 (3.3)       | 641 | 40.8 (3.3)    | 1064 | 40.8 (3.3)    |
| <b>Mean segmental lumen area (mm<sup>2</sup>)</b>                      | 1756 | 24.5 (7.4)       | 640 | 24.9 (6.7)    | 1065 | 24.2 (6.8)    |
| <b>Mean segmental wall area (mm<sup>2</sup>)</b>                       | 1758 | 34.4 (6.2)       | 641 | 36.0 (6.0)    | 1066 | 34.6 (6.2)    |
| <b>Mean segmental percent wall area</b>                                | 1758 | 60.3 (2.9)       | 641 | 60.9 (2.8)    | 1066 | 60.6 (2.8)    |
| <b>PRM fSAD (Ratio of voxels fSAD to the total voxels in the lung)</b> | 1588 | 19.7 (15.2)      | 579 | 19.6 (14.9)   | 960  | 18.4 (14.8)   |
| <b>Dysanapsis (airway to lung ratio)</b>                               | 1755 | 0.031<br>(0.004) | 640 | 0.031 (0.004) | 1064 | 0.031 (0.004) |

---

\*Values are mean (SD) except as stated

**Table A2. Descriptive Statistics of High Risk OSA by Gender**

| Variable*                                               | Overall                   |              | Males (n=973) | Females (n=794) | P-value† |             |       |
|---------------------------------------------------------|---------------------------|--------------|---------------|-----------------|----------|-------------|-------|
|                                                         | Study Population (n=1767) |              |               |                 |          |             |       |
| Age (years)                                             | 1767                      | 62.9 (8.9)   | 973           | 63.8 (8.7)      | 794      | 61.7 (8.9)  | <.001 |
| <b>Race</b>                                             |                           |              |               |                 |          |             | 0.001 |
| <b>White (%)</b>                                        | 1767                      | 1370 (77.5%) | 973           | 781 (80.3%)     | 794      | 589 (74.2%) |       |
| <b>Black (%)</b>                                        | 1767                      | 314 (17.8%)  | 973           | 144 (14.8%)     | 794      | 170 (21.4%) |       |
| <b>Other (%)</b>                                        | 1767                      | 83 (4.7%)    | 973           | 48 (4.9%)       | 794      | 35 (4.4%)   |       |
| <b>Ethnicity [Hispanic] (%)</b>                         | 1766                      | 81 (4.6%)    | 973           | 52 (5.3%)       | 793      | 29 (3.7%)   | 0.092 |
| <b>BMI</b>                                              | 1767                      | 28.1 (5.2)   | 973           | 28.1 (4.8)      | 794      | 28.2 (5.7)  | 0.774 |
| <b>Height (cm)</b>                                      | 1767                      | 170.2 (9.6)  | 973           | 176.4 (7.1)     | 794      | 162.7 (6.3) | <.001 |
| <b>Neck circumference (cm)</b>                          | 1767                      | 37.8 (4.7)   | 973           | 40.3 (3.8)      | 794      | 34.9 (4.0)  | <.001 |
| <b>Current smoking (%)</b>                              | 1767                      | 730 (41.3%)  | 973           | 378 (38.8%)     | 794      | 352 (44.3%) | 0.020 |
| <b>Pack years smoking</b>                               | 1767                      | 48.5 (27.1)  | 973           | 51.7 (29.1)     | 794      | 44.7 (24.0) | <.001 |
| <b>History of stroke (%)</b>                            | 1766                      | 81 (4.6%)    | 973           | 40 (4.1%)       | 793      | 41 (5.2%)   | 0.290 |
| <b>History of hypertension (%)</b>                      | 1767                      | 811 (45.9%)  | 973           | 450 (46.2%)     | 794      | 361 (45.5%) | 0.743 |
| <b>History of palpitations, irregular heartbeat (%)</b> | 1766                      | 200 (11.3%)  | 972           | 97 (10.0%)      | 794      | 103 (13.0%) | 0.048 |
| <b>BSQ Apnea Risk [High Risk] (%)</b>                   | 1767                      | 1070 (60.6%) | 973           | 592 (60.8%)     | 794      | 478 (60.2%) | 0.784 |
| <b>DOISNORE50 Score</b>                                 | 1767                      | 5.0 (1.6)    | 973           | 5.4 (1.5)       | 794      | 4.4 (1.4)   | <.001 |
| <b>DOISNORE50 Risk [High Risk] (%)</b>                  | 1767                      | 642 (36.3%)  | 973           | 477 (49.0%)     | 794      | 165 (20.8%) | <.001 |
| <b>Percent Predicted Pre-Bronchodilator FEV1</b>        | 1767                      | 68.1 (26.8)  | 973           | 67.6 (27.2)     | 794      | 68.7 (26.2) | 0.375 |
| <b>Percent Predicted Post-Bronchodilator FEV1</b>       | 1767                      | 74.8 (26.3)  | 973           | 74.1 (26.7)     | 794      | 75.6 (25.9) | 0.219 |
| <b>Percent Predicted Pre-Bronchodilator FVC</b>         | 1767                      | 86.0 (19.6)  | 973           | 86.9 (19.8)     | 794      | 85.0 (19.4) | 0.042 |
| <b>Percent Predicted Post-Bronchodilator FVC</b>        | 1767                      | 91.9 (18.1)  | 973           | 92.7 (18.0)     | 794      | 90.8 (18.3) | 0.027 |
| <b>Pre-Bronchodilator FEV1/FVC</b>                      | 1767                      | 0.6 (0.2)    | 973           | 0.6 (0.2)       | 794      | 0.6 (0.2)   | <.001 |
| <b>Post-Bronchodilator FEV1/FVC</b>                     | 1767                      | 0.6 (0.2)    | 973           | 0.6 (0.2)       | 794      | 0.6 (0.2)   | <.001 |
| <b>CAT Score</b>                                        | 1687                      | 13.9 (8.2)   | 935           | 13.2 (8.2)      | 752      | 14.9 (8.2)  | <.001 |
| <b>SGRQ Score</b>                                       | 1624                      | 32.8 (20.4)  | 901           | 30.4 (20.1)     | 723      | 35.7 (20.4) | <.001 |
| <b>Annualized Rate of HCU/Drug Exacerbations</b>        | 1716                      | 0.4 (0.7)    | 945           | 0.3 (0.6)       | 771      | 0.5 (0.9)   | <.001 |
| <b>Annualized Rate of Severe Exacerbations</b>          | 1716                      | 0.1 (0.4)    | 945           | 0.1 (0.3)       | 771      | 0.2 (0.5)   | 0.011 |

|                                                                        |      |                  |     |                  |     |                  |       |
|------------------------------------------------------------------------|------|------------------|-----|------------------|-----|------------------|-------|
| <b>Low attenuation areas on full-lung CT</b>                           |      |                  |     |                  |     |                  |       |
| <b>Percent below and including - 856 Hounsfield units at RV</b>        | 1755 | 23.7<br>(21.4)   | 965 | 26.0<br>(21.6)   | 790 | 20.8<br>(20.7)   | <.001 |
| <b>Percent below and including - 950 Hounsfield units at TLC</b>       | 1756 | 7.7<br>(10.2)    | 968 | 8.6<br>(10.5)    | 788 | 6.5 (9.7)        | <.001 |
| <b>Airway Dimensions</b>                                               |      |                  |     |                  |     |                  |       |
| <b>Trachea lumen area (mm<sup>2</sup>)</b>                             | 1756 | 275.1<br>(75.4)  | 970 | 315.4<br>(70.3)  | 786 | 225.2<br>(45.7)  | <.001 |
| <b>Trachea wall area (mm<sup>2</sup>)</b>                              | 1756 | 181.7<br>(35.5)  | 970 | 205.0<br>(26.9)  | 786 | 152.8<br>(20.5)  | <.001 |
| <b>Trachea percent wall area</b>                                       | 1756 | 40.2<br>(3.3)    | 970 | 39.8<br>(3.5)    | 786 | 40.7<br>(3.1)    | <.001 |
| <b>Mean segmental lumen area (mm<sup>2</sup>)</b>                      | 1756 | 24.5<br>(7.4)    | 969 | 27.0<br>(7.9)    | 787 | 21.5<br>(5.2)    | <.001 |
| <b>Mean segmental wall area (mm<sup>2</sup>)</b>                       | 1758 | 34.4<br>(6.2)    | 970 | 37.6<br>(5.7)    | 788 | 30.5<br>(4.3)    | <.001 |
| <b>Mean segmental percent wall area</b>                                | 1758 | 60.3<br>(2.9)    | 970 | 60.2<br>(3.0)    | 788 | 60.4<br>(2.7)    | 0.152 |
| <b>PRM fSAD (Ratio of voxels fSAD to the total voxels in the lung)</b> | 1588 | 19.7<br>(15.2)   | 892 | 21.7<br>(15.3)   | 696 | 17.3<br>(14.8)   | <.001 |
| <b>Dysanapsis (airway to lung ratio)</b>                               | 1755 | 0.031<br>(0.004) | 968 | 0.031<br>(0.004) | 787 | 0.031<br>(0.004) | 0.053 |

\*Values are mean (SD) except as stated; †P-value for two sample t-test assuming unequal variances when mean (standard deviation) is presented or for Pearson chi-square test for categorical variables.
